# Supplementary figures and images for: Neutrophils interact with cholangiocytes to cause cholestatic changes in alcoholic hepatitis
Source: HighWire-hosted journal article supplement (doi:10.1136/gutjnl-2020-322540), 2020-11-19

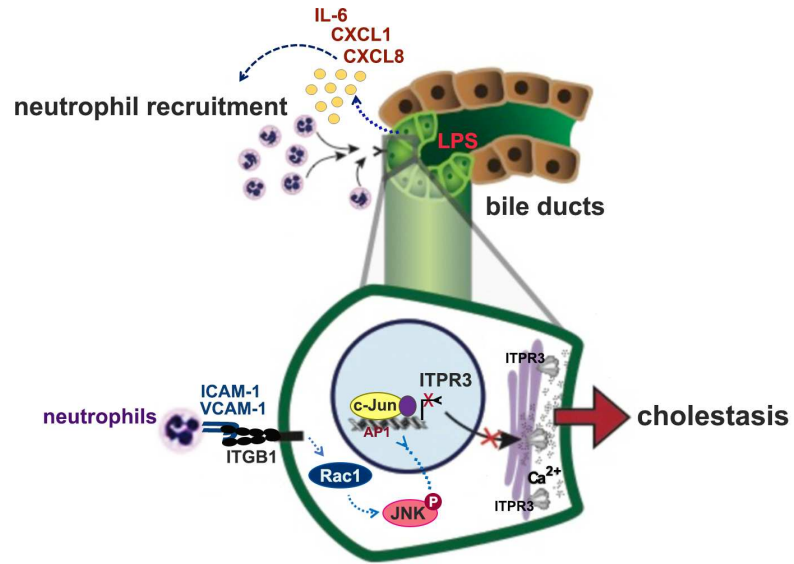

Takeuchi M. *et al.* Graphic Abstract

Supplement: gutjnl-2020-322540supp013_data_supplement.pdf [file gutjnl-2020-322540supp013_data_supplement.pdf]

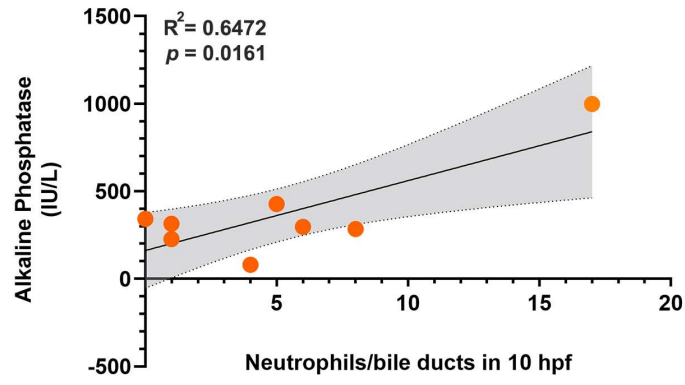

Takeuchi M. *et al.* Suppl. Fig. S2

Supplement: gutjnl-2020-322540supp004_data_supplement.pdf [file gutjnl-2020-322540supp004_data_supplement.pdf]

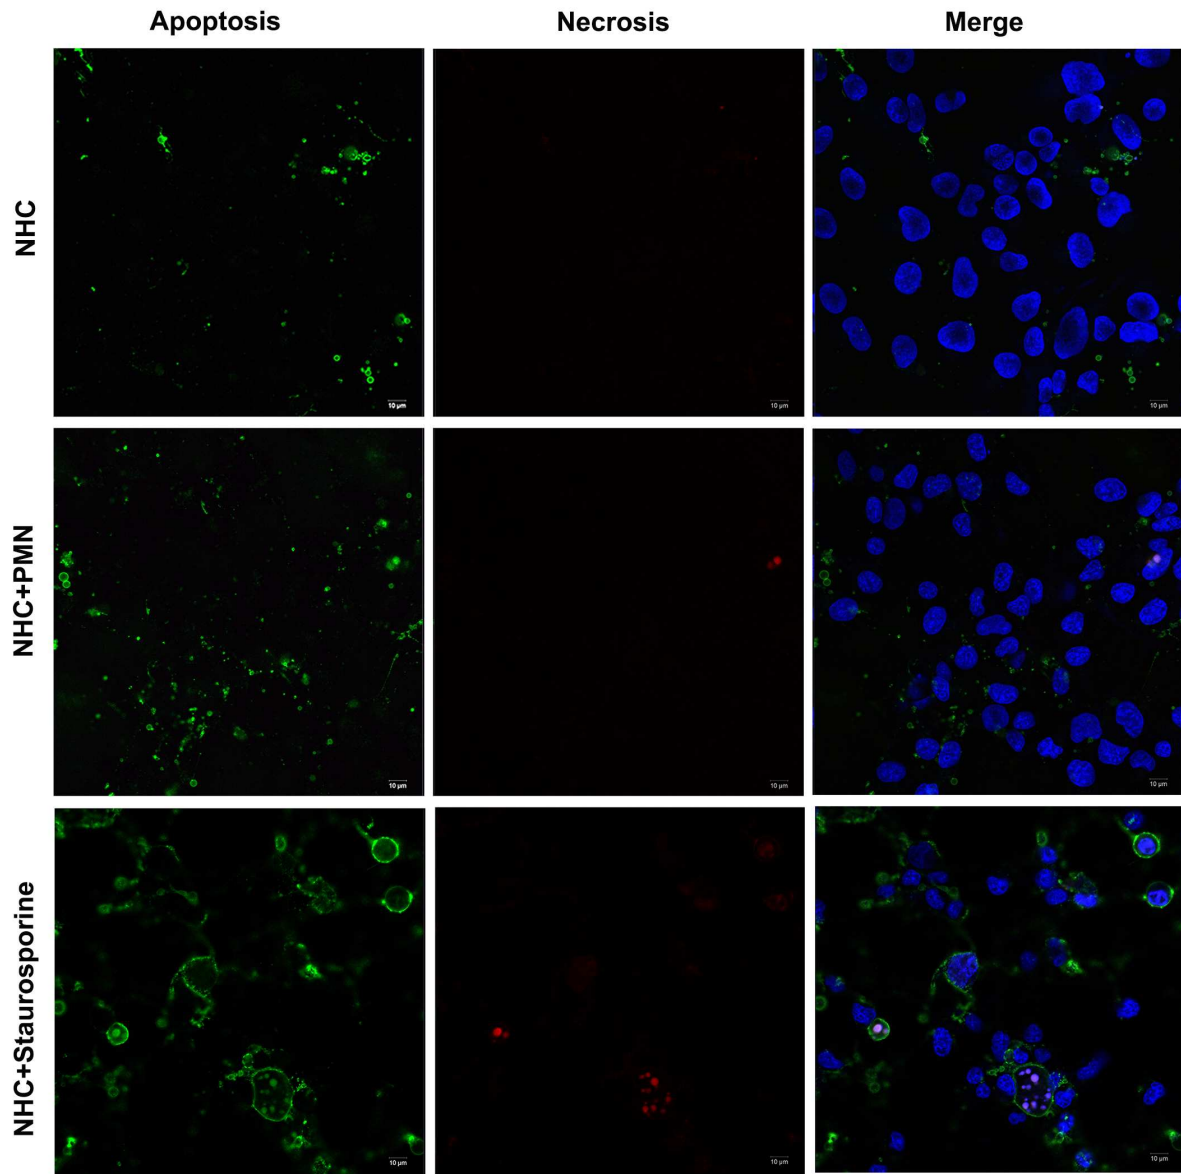

Takeuchi M. *et al.* Suppl. Fig. S7

Supplement: gutjnl-2020-322540supp009_data_supplement.pdf [file gutjnl-2020-322540supp009_data_supplement.pdf]
